# Supplementary material for: Using Smartwatches to Detect Face Touching
Source: MDPI journal article supplement (doi:10.3390/s21196528), 2021-09-30
Supplement: s1 [file s1]

**Table S1.** Average number of samples per participant and the total number of samples by window size from 2–16 seconds.

| Window Size          | Average number of samples<br>per participant | Total number of<br>samples |
|----------------------|----------------------------------------------|----------------------------|
| 2                    | 787                                          | 7868                       |
| 3                    | 523                                          | 5230                       |
| 4                    | 390                                          | 3900                       |
| <b>5<sup>a</sup></b> | <b>311</b>                                   | <b>3107</b>                |
| 6                    | 259                                          | 2593                       |
| 7                    | 220                                          | 2195                       |
| 8                    | 192                                          | 1920                       |
| <b>9<sup>b</sup></b> | <b>170</b>                                   | <b>1697</b>                |
| 10                   | 152                                          | 1521                       |
| 11                   | 139                                          | 1394                       |
| 12                   | 129                                          | 1293                       |
| 13                   | 119                                          | 1193                       |
| 14                   | 109                                          | 1094                       |
| 15                   | 100                                          | 998                        |
| 16                   | 99                                           | 987                        |

*a*: the best window size for FT/NFT recognition

*b*: the best window size for IAR

**Table S2.** F1-score of recognizing face touching activities (face touching vs. non-face touching) using the window size of 2 and 16 seconds for different classifiers. Each value is the mean and standard deviation of the 10-fold nested cross-validation.

| Classifier    | 2 seconds   | 16 seconds  |
|---------------|-------------|-------------|
| LR            | 0.83 (0.11) | 0.87 (0.13) |
| SVM           | 0.80 (0.15) | 0.82 (0.22) |
| Decision Tree | 0.82 (0.14) | 0.80 (0.15) |
| Random Forest | 0.84 (0.11) | 0.86 (0.16) |

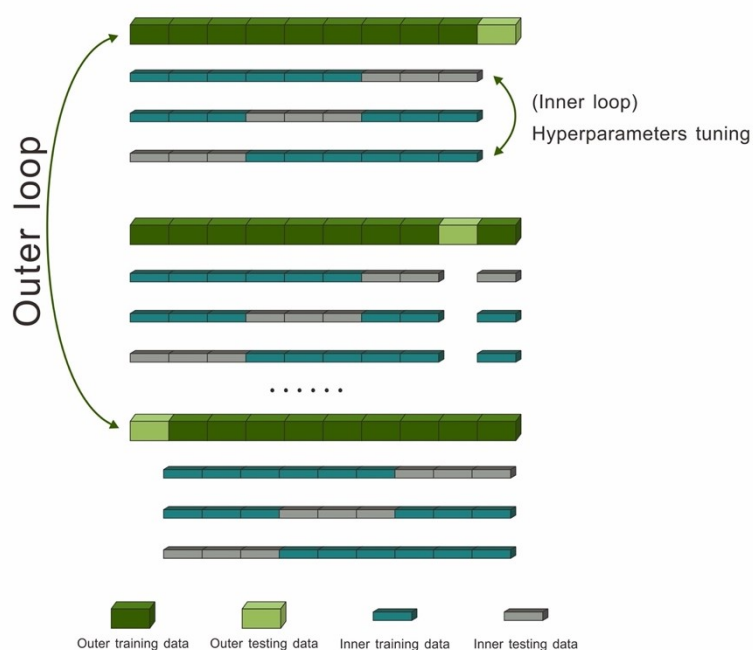

**Figure S1.** Illustration of how nested cross-validation works. Each block refers to one participant in the dataset.

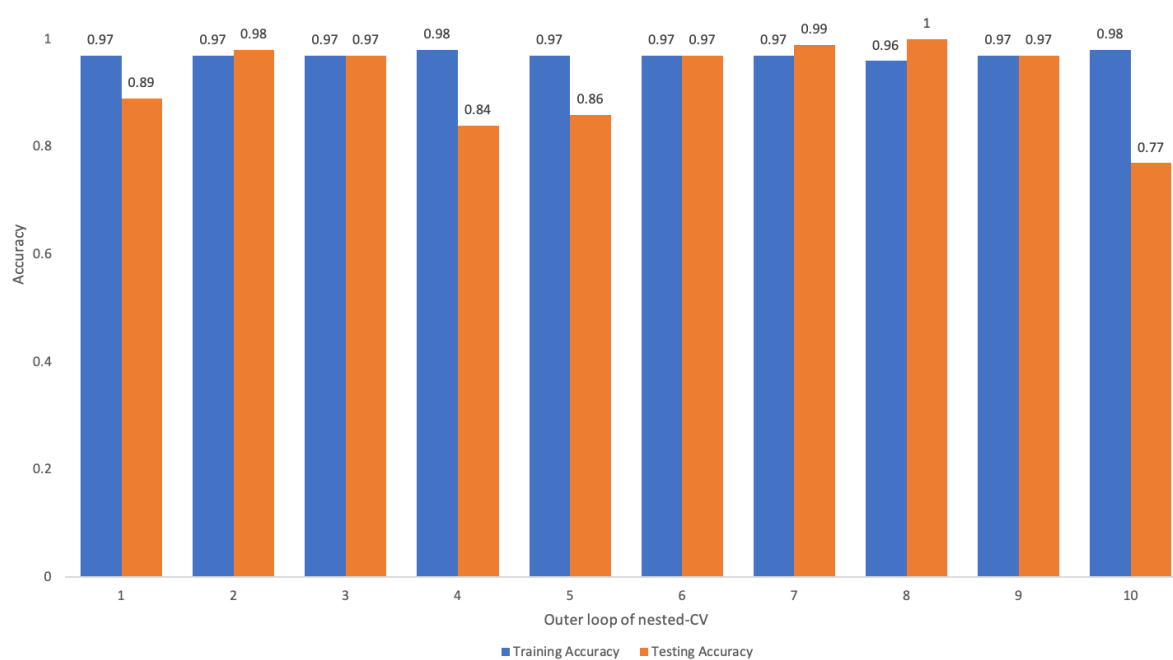

**Figure S2.** Training and testing accuracy of logistic regression for FT/NFT recognition task. Each pair of bars represents the accuracy for the corresponding outer loop of the nested cross-validation.

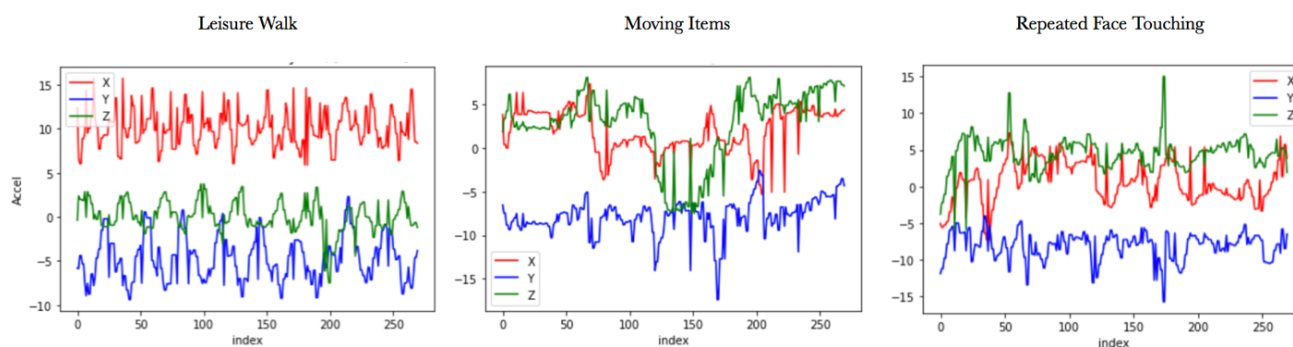

**Figure S3.** Visualization of 9s acceleration signal from leisure walk, moving items and repeated face touching.

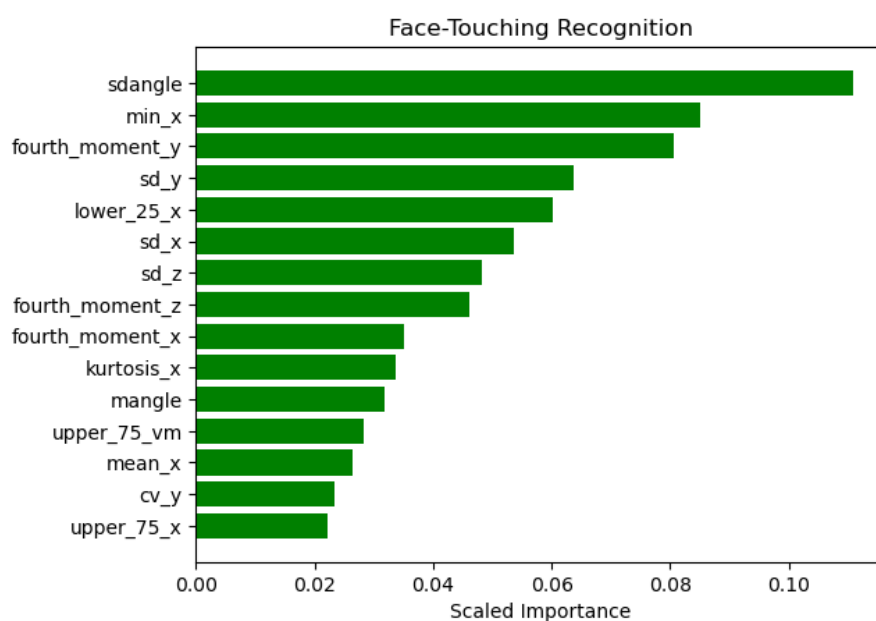

**Figure S4.** Feature Importance for Face-Touching Recognition.

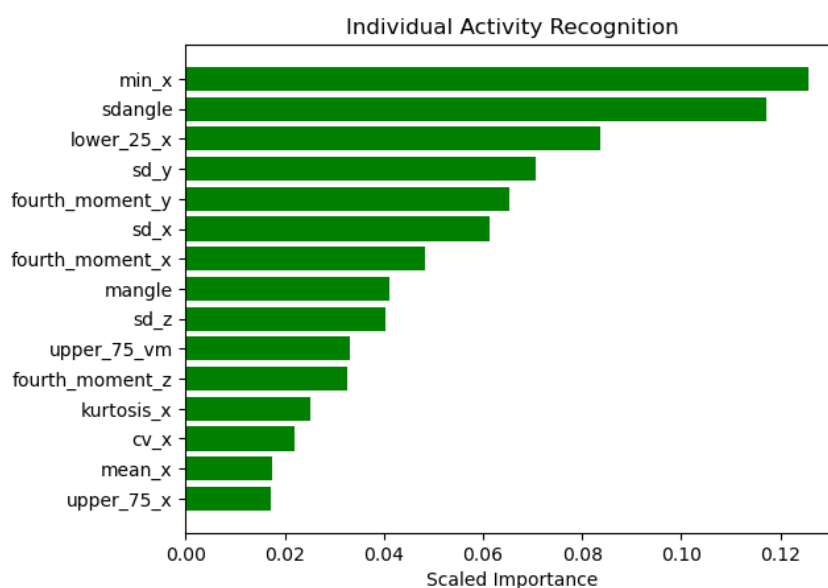

**Figure S5.** Feature Importance for Individual Activity Recognition.

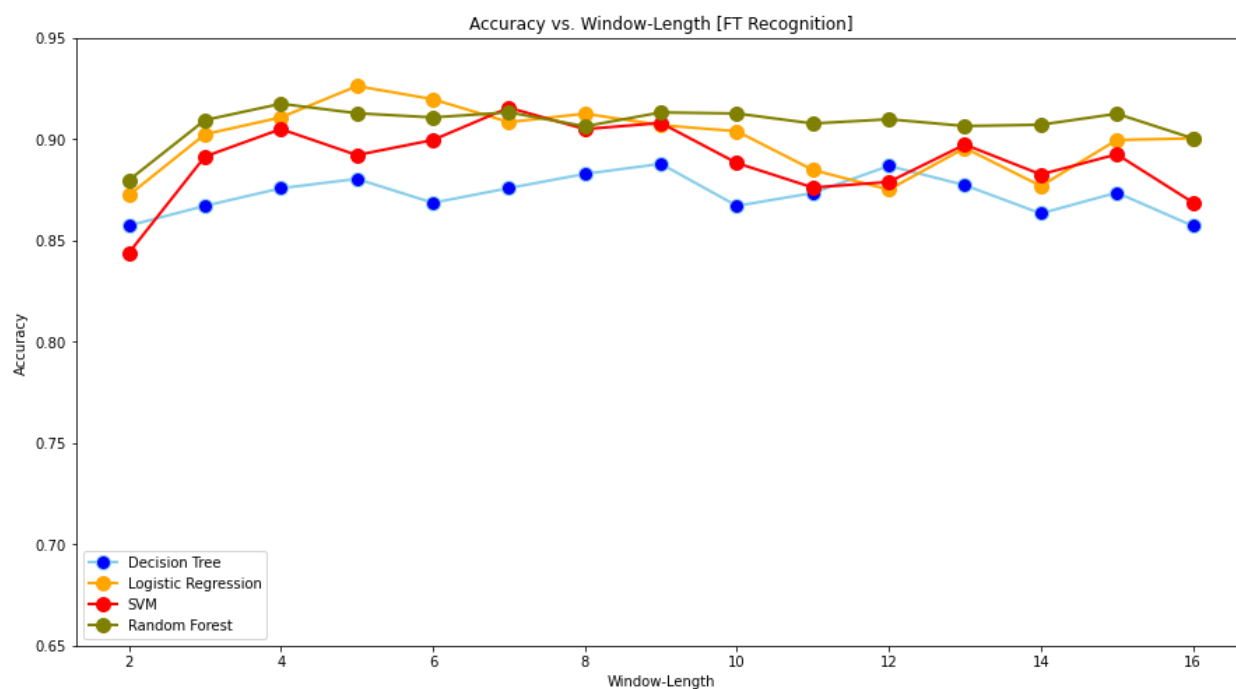

Figure S6. Accuracy of each machine learning method with different window lengths on FT/NFT recognition.

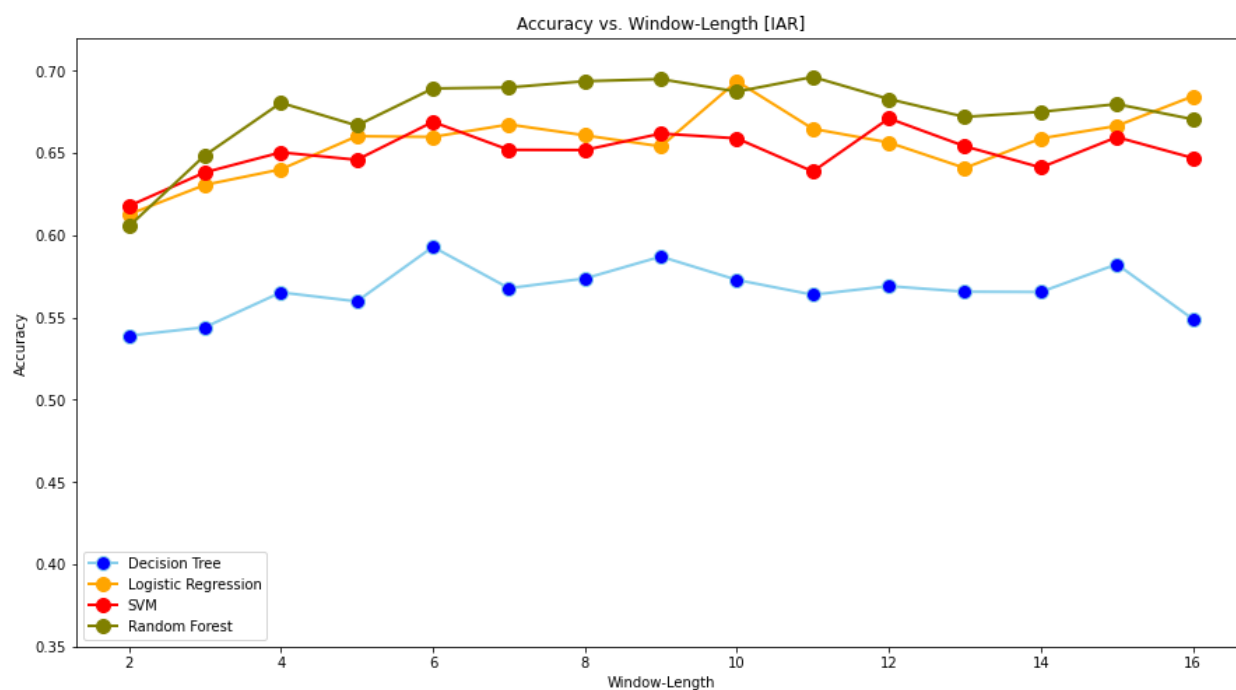

Figure S7. Accuracy of each machine learning method with different window lengths on IAR.
